# Supplementary material
Source: MDPI journal article supplement (https://www.mdpi.com/2073-4352/14/6/483)
Supplement: s1 [file s1]

## Supporting information

**Table S1** Interaction energies for selected contacts (kJ/mol)

| Crystal | Interaction pair           | Contact                                                                   | E <sub>ele</sub> | E <sub>pol</sub> | E <sub>disp</sub> | E <sub>rep</sub> | E <sub>tot</sub> |
|---------|----------------------------|---------------------------------------------------------------------------|------------------|------------------|-------------------|------------------|------------------|
| Oxy-1   | Oxy A-Oxy B<br>(asym unit) | O1A-H1A...O3B<br>O1B-H1B...O3A                                            | -46.3            | -14.4            | -35.8             | 37.4             | -59.1            |
|         | Oxy A-Oxy C<br>(asym unit) | C20A-H20H...H15A-C15C                                                     | -3.6             | -0.3             | -24.7             | 11.7             | -16.9            |
|         | Oxy B-Oxy C<br>(asym unit) | C1B-H1BA...H20B-C20C                                                      | -4.9             | -2.1             | -42.2             | 9.5              | -39.5            |
|         | Oxy B-Oxy D<br>(asym unit) | C20B-H20E...C21D<br>C15B-H15D...H5D-C5D<br>C7B-H7BB...H1DA-C1D            | -2.3             | -1.5             | -45.7             | 17.7             | -31.8            |
|         | Oxy C-Oxy D<br>(asym unit) | O1D-H1D...O3C<br>O1C-H1C...O3D<br>C12C-H12A...O3D<br>O1C-H1CB...H12G-C12D | -82.4            | -21.2            | -36.9             | 72.1             | -68.4            |
|         | Oxy B-Oxy D                | O2A-H2A...O1C<br>C16C-H16A...O2A                                          | -41.3            | -9.7             | -18.1             | 0                | -69.1            |
|         | Oxy A-Oxy C                | O2C-H2C...O1A                                                             | -46.7            | -14.7            | -17.8             | 0                | -79.3            |
|         | Oxy A-Oxy A                | C19A-H19G...C3A                                                           | -4.8             | -2.7             | -32.2             | 8.9              | -30.8            |
|         | Oxy A -Oxy D               | C18A-H19I...H19J-C19D                                                     | 0.2              | -0.9             | -26.7             | 7.7              | -19.7            |
|         | Oxy B-Oxy D                | O2B-H2B...O1D<br>C16D-H16G...O2B                                          | -54.7            | -13.5            | -16.7             | 0                | -84.9            |
|         | Oxy B-Oxy D                | O2D-H2D...O1B<br>C16B-H16C...O2D                                          | -66.4            | -17.7            | -16.4             | 0                | -100.5           |
|         | Oxy B-Oxy D                | C18B-H19F...C21D                                                          | -3.2             | -1.1             | -36.3             | 11.4             | -29.2            |
|         | Oxy B-Oxy C                | C19B-H19D...H18A-C18C<br>C19B-H19E...H11B-C11C                            | -5.0             | -1.6             | -33.7             | 12.4             | -27.9            |
|         |                            | C7C-H7CA...H15G-C15D<br>C15C-H15A...H15G-C15D                             | -4.5             | -0.3             | -26.4             | 13.8             | -17.4            |
| Oxy-2   | Oxy A-Oxy B<br>(asym unit) | O1A-H1A...O3B<br>C20A-H20D...O3B<br>O1B-H1B...O3A                         | -82.2            | -19.2            | -36.8             | 63.2             | -75.0            |
|         | Oxy B-Oxy D<br>(asym unit) | C5B-H5B...H11H-C11D<br>C9B-H9B...H12H-C12D                                | -5.1             | -1.6             | -42.4             | 13.5             | -35.6            |
|         | Oxy B-Oxy C<br>(asym unit) | C15B-H15B...C3C<br>C15B-H15B...H5C-C5C                                    | -0.3             | -1.4             | -45.5             | 14.4             | -32.8            |
|         | Oxy C-Oxy D<br>(asym unit) | C21C-H21C...O1D                                                           | -12.0            | -1.9             | -21.2             | 8.3              | 26.8             |
|         | Oxy A-Oxy D                | C9A-H9A...C20D                                                            | 0.7              | -0.5             | -28.4             | 7.3              | -20.9            |
|         | Oxy A-Oxy-A                | O2A-H2A...O1A<br>C16A-H16D...O2A                                          | -60.2            | -15.9            | -18.7             | 0                | -94.8            |
|         | Oxy A-Oxy-D                | C19A-H19F...C3D<br>C8A-H8A...O3D                                          | -3.0             | -2.5             | -28.1             | 8.5              | -25.1            |
|         | Oxy A-Oxy B                | C15A-H15D...H15A-C15B                                                     | -3.5             | -0.3             | -18.7             | 8.6              | -13.9            |
|         | Oxy A-Oxy D                | C18A-H18E...H15G-C15D<br>C12A-H12D...H15H-C15D                            | -1.6             | -0.4             | -20.1             | 7.0              | -15.1            |
|         | Oxy B- Oxy B               | O2B-H2B...O1B                                                             | -77.2            | -18.8            | -18.8             | 0                | -114.8           |

|                   |                              |                                                                        |       |       |       |      |       |
|-------------------|------------------------------|------------------------------------------------------------------------|-------|-------|-------|------|-------|
|                   |                              | C16B-H16B...O2B                                                        |       |       |       |      |       |
|                   | Oxy B-Oxy D                  | C19B-H19C...C18D                                                       | -6.1  | -2.7  | -31.9 | 10.4 | -30.0 |
|                   | Oxy B-Oxy C                  | C18B-H18C...H18I-C18C                                                  | 0     | -0.3  | -9.1  | 2.3  | -7.1  |
|                   | Oxy B-Oxy D                  | C18B-H18A...O3D                                                        | -7.7  | -1.7  | -10.1 | 3.2  | -16.3 |
|                   | Oxy B-Oxy A                  | C6B-H6BB...H21A-C21A                                                   | -13.1 | -1.7  | -10.1 | 3.6  | -21.3 |
|                   | Oxy B-Oxy D                  | C15B-H15A...H15D-C15A                                                  | -3.0  | -0.3  | -18.7 | 8.6  | -13.4 |
|                   | Oxy C-Oxy C                  | O1C-H1C...O3C                                                          | -28.6 | -6.6  | -9.4  | 0    | -44.6 |
|                   | Oxy C-Oxy D                  | O1D-H1D...O1C                                                          | -24.6 | -5.7  | -13.6 | 0    | -43.9 |
|                   | Oxy C-Oxy D                  | C19D-H19K...O2C<br>O2D-H2D...H4CB-C4C                                  | -8.2  | -1.9  | -21.4 | 6.7  | -24.8 |
|                   |                              | C7C-H7CB...H7DA-C7D                                                    | -0.9  | -0.4  | -26.0 | 8.0  | -19.3 |
| <b>Oxy-acetic</b> | Oxy-acetic acid              | O4-H4...O1                                                             | -74.6 | -14.5 | -12.9 | 45.4 | -56.6 |
|                   | Oxy-Oxy                      | O2-H2...O3<br>C21-H21...H4B-C4                                         | -53.6 | -14.2 | -14.2 | 0    | -82.0 |
|                   | Oxy-acetic acid              | O1-H1...O5                                                             | -34.4 | -6.3  | -10.0 | 22.5 | -28.2 |
|                   | Oxy-Oxy                      | C15-H15B...H11A-C11<br>C19-H19A...H7A-C7<br>C1-H1B...H7B-C7            | -7.3  | -2.3  | -39.8 | 13.8 | -35.6 |
|                   | Oxy-Oxy                      | C4-H4A...O3<br>C15-H15A...H20-C20                                      | -7.6  | -2.7  | -28.7 | 7.4  | -31.6 |
|                   | Oxy-acetic acid              | C20-H20A...H23A-C23                                                    | 0.3   | -0.4  | -7.4  | 2.8  | -4.7  |
| <b>Metr</b>       | Metr A-Metr B<br>(asym unit) | C18A-H18D...C4D<br>C6A-H6AB...C9B<br>C6A-H6AB...C9B<br>C19B-H19B...C4A | -7.2  | -1.4  | -49.3 | 17.3 | -40.6 |
|                   | Metr A-Metr A                | O1A-H1A...O2A<br>C19A-H19D...O2A<br>C19A-H19F...H2AA-C2A               | -40.9 | -7.7  | -18.0 | 25.9 | -40.7 |
|                   | Metr A- Metr B               | C1B-H1BB...O1A<br>C16A-H16D...C11B                                     | -9.7  | -2.3  | -31.3 | 12.4 | -30.9 |
|                   | Metr A-Metr A                | C16A- H16C...O2A<br>C16A- H16C...H4A-C4A                               | -1.6  | -1.7  | -12.3 | 6.2  | -9.4  |
|                   | Metr A-Metr B                | C15A-H15C...H19C-C19B                                                  | 0     | -0.6  | -14.4 | 4.6  | -10.4 |
|                   | Metr A-Metr A                | C15A-H15C...H12A-C12A                                                  | 2.3   | -0.7  | -19.9 | 5.7  | -12.6 |
|                   | Metr A-Metr B                | C2A- H2AB...C4B                                                        | -7.7  | -3.2  | -21.3 | 5.8  | -26.4 |
|                   | Metr A-Metr B                | C1A- H1AB...O1B<br>C11A-H11A...H16A-C16B                               | -4.2  | -2.1  | -28.7 | 10.5 | -24.5 |
|                   | Metr B-Metr B                | O1B- H1B...O2B<br>C2B- H2BB...O1B<br>O12B- H12B...O2B                  | -48.9 | -9.7  | -16.2 | 29.6 | -45.2 |
|                   | Metr B-Metr B                | C4B-H4B...H18A-C18B                                                    | -3.6  | -1.5  | -10.8 | 3.2  | -12.7 |

Abbreviations:  $E_{\text{ele}}$ -electrostatic term;  $E_{\text{pol}}$ -polarization term;  $E_{\text{disp}}$ -dispersion term;  $E_{\text{rep}}$ -dispersion term;  $E_{\text{tot}}$ -total intermolecular interaction energy

**Table S2** Geometry of intermolecular interactions for studied crystal structures ( $\text{\AA}$ ,  $^\circ$ )

| Structure    | D-H...A           | D-H   | H...A       | D...A     | $\angle(\text{D-H}\cdots\text{A})$ |
|--------------|-------------------|-------|-------------|-----------|------------------------------------|
| <i>Oxy-1</i> | (i) O1A-H1A...O3B | 0.823 | 2.05518(16) | 2.8098(2) | 152.298(3)                         |
|              | (i) O1B-H1B...O3A | 0.814 | 1.99974(15) | 2.7531(2) | 153.725(2)                         |

|            |                        |             |             |             |               |
|------------|------------------------|-------------|-------------|-------------|---------------|
|            | C20A-H20H...H15A-C15C  | 0.960       |             | 2.21361(18) |               |
|            | C20B-H20E...C21D       | 0.960       | 2.8922(3)   | 3.7303(3)   | 146.4690(16)  |
|            | C15B-H15D...H5D-C5D    |             |             | 2.19370(18) |               |
|            | C7B-H7BB...H1DA-C1D    |             |             | 2.3878(2)   |               |
|            | (i) O1D-H1D...O3C      | 0.820       | 1.90749(14) | 2.6992(2)   | 161.994(2)    |
|            | (i) O1C-H1C...O3D      | 0.819       | 2.96975(14) | 2.7114(2)   | 150.181(3)    |
|            | (ii) O2A-H2A...O1C     | 0.816       | 1.77336(17) | 2.5868(3)   | 174.0906(7)   |
|            | (ii) C16C-H16A...O2A   | 0.970       | 2.7021(3)   | 3.1452(3)   | 108.342(9)    |
|            | (iii) O2C-H2C...O1A    | 0.824       | 1.83654(17) | 2.6230(3)   | 159.118(3)    |
|            | (iv) O2B-H2B...O1D     | 0.820       | 1.88689(18) | 2.5870(3)   | 142.660(4)    |
|            | (v) C16D-H16G...O2B    | 0.970       | 2.6517(3)   | 3.1566(3)   | 112.777(5)    |
|            | (vi) O2D-H2D...O1B     | 0.827       | 1.76286(17) | 2.5878(3)   | 175.4502      |
|            | (vi) C16B-H16C...O2D   | 0.970       | 2.6009(2)   | 3.2623(3)   | 125.605(5)    |
|            | C15C-H15A...H15G-C15D  | 0.970       |             | 2.3133(2)   |               |
| Oxy-2      | (i) O1A-H1A...O3B      | 0.817       | 1.95987(11) | 2.77252(15) | 172.9784(6)   |
|            | (i) O1B-H1B...O3A      | 0.825       | 1.97416(10) | 2.79317(15) | 171.7078(7)   |
|            | C5B-H5B...H11H-C11D    | 0.980/0.970 |             | 2.32409(14) |               |
|            | C15B-H15B...H5C-C5C    | 0.970       |             | 2.54416(10) |               |
|            | (i) C21C-H21C...O1D    | 0.930       | 2.45983(15) | 3.23776(19) | 154.041(9)    |
|            | (vii) O2A-H2A...O1A    | 0.821       | 1.82200(7)  | 2.63859(11) | 172.9192(5)   |
|            | (vii) C16A-H16D...O2A  | 0.970       | 2.73326(12) | 3.21162(12) | 111.0260(8)   |
|            | C15A-H15D...H15A-C15B  | 0.970       |             | 2.27015(13) |               |
|            | (viii) O2B-H2B...O1B   | 0.817       | 1.78115(8)  | 2.60353(11) | 172.5446(5)   |
|            | (viii) C16B-H16B...O2B | 0.970       | 2.71829(12) | 3.28630(13) | 117.9204(13)  |
|            | C19B-H19C...C18D       | 0.960       | 2.77642(17) | 3.5320(2)   | 136.1621(16)  |
|            | C15B-H15A...H15D-C15A  | 0.970       |             | 2.27015(13) |               |
|            | (ix) O1C-H1C...O3C     | 0.825       | 2.06867(1)  | 2.87275(16) | 164.7665(1)   |
|            | (ix) O1D-H1D...O1C     | 0.828       | 2.06856(9)  | 2.86440(12) | 161.1981(14)  |
| Oxy-acetic | (x) O1-H1...O5         | 0.824       | 2.04556(7)  | 2.84518(10) | 163.3539(5)   |
|            | (xi) O2-H2...O3        | 0.823       | 1.82859(8)  | 2.64782(11) | 173.318(4)    |
|            | (i) O4-H4...O1         | 0.826       | 1.82952(9)  | 2.65392(13) | 175.8624(4)   |
|            | C21-H21...H4B-C4       | 0.930/0.970 |             | 2.26982(8)  |               |
|            | C19-H19A...H7A-C7      | 0.960/0.970 |             | 2.36637(9)  |               |
|            | C23-H23A...O5          | 0.960       | 2.6940(2)   | 3.4954(3)   | 141.322(3)    |
|            | C18A-H18D...C4D        | 0.960       | 2.85576(4)  | 3.64325(4)  | 139.9359      |
| Metr       | (vi) O1A-H1A...O2A     | 0.824       | 2.07925(3)  | 2.89537(4)  | 170.68031(14) |
|            | (viii) C1B-H1BB...O1A  | 0.970       | 2.61496(3)  | 3.42166(4)  | 140.7613(7)   |
|            | C16A-H16D...C11B       | 0.970       | 2.81361(5)  | 3.77175(6)  | 169.6156(2)   |
|            | C15A-H15C...H19C-C19B  | 0.970/0.960 |             | 2.37818(4)  |               |
|            | C2A- H2AB...C4B        | 0.970       | 2.88077(4)  | 3.66832(5)  | 138.9892(4)   |
|            | (viii) O1B- H1B...O2B  | 0.844       | 2.01190(3)  | 2.84212(4)  | 167.8053(2)   |

(i)  $x,y,z \rightarrow x,y,z$ ; (ii)  $x,y,z \rightarrow -x,-1/2+y,1-z$ ; (iii)  $x,y,z \rightarrow -x,-1/2+y,-z$ ; (iv)  $x,y,z \rightarrow 1-x,1/2+y,-z$ ; (v)  $x,y,z \rightarrow 1-x,1/2+y,-z$ ; (vi)  $x,y,z \rightarrow 1-x,-1/2+y,1-z$ ; (vii)  $x,y,z \rightarrow 2-x, 1/2+y, 1-z$ ; (viii)  $x,y,z \rightarrow 2-x,-1/2+y,2-z$ ; (ix)  $x,y,z \rightarrow 3-x,-1/2+y,2-z$ ; (x)  $x,y,z \rightarrow x,1-y,1-z$ ; (xi)  $x,y,z \rightarrow 1/2-x,-1/2+y,1/2-z$

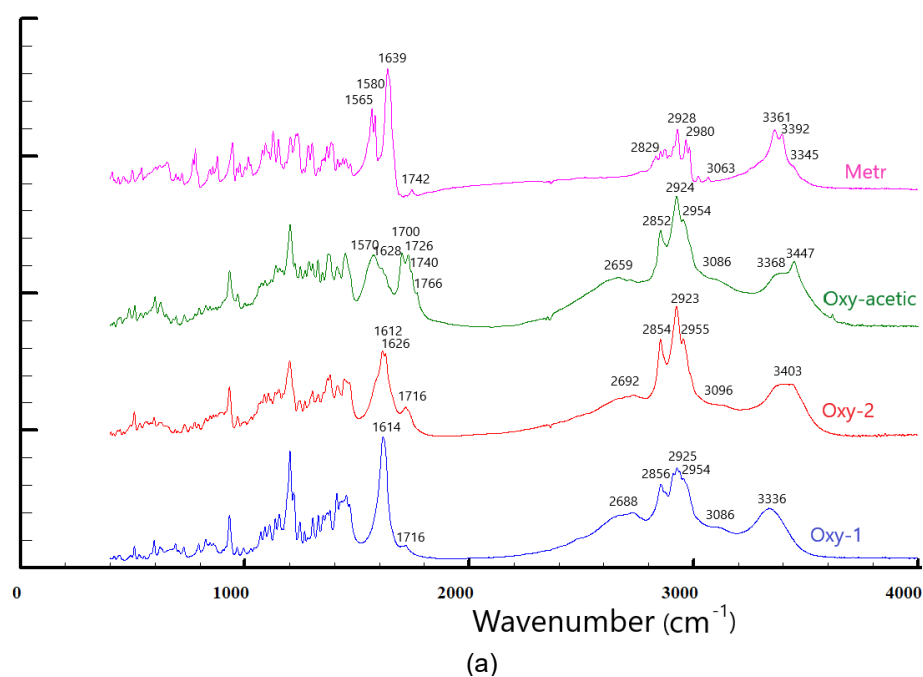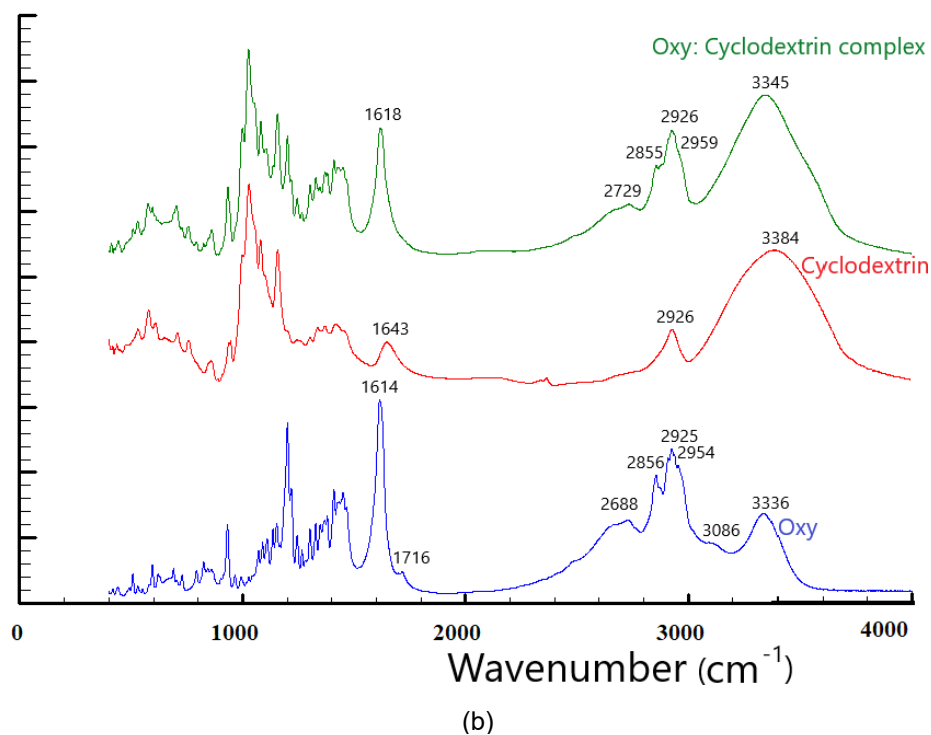

Figure S1. FTIR spectra of the four crystal studied (a); spectra of oxymetholone, beta-cyclodextrin and oxymetholone: cyclodextrin complex (b)

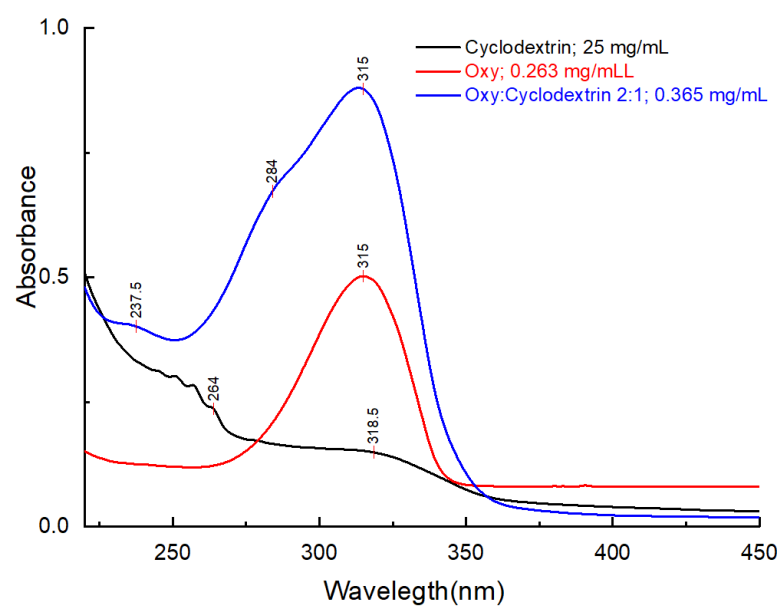

Figure S2. UV spectra of samples
